# Supplementary material for: 8(meso)-Pyridyl-BODIPYs: Effects of 2,6-Substitution with Electron-Withdrawing Nitro, Chloro, and Methoxycarbonyl Groups
Source: MDPI journal article supplement (doi:10.3390/molecules28124581), 2023-06-06
Supplement: s1 [file s1]

# Supplemental Materials

## 8(*meso*)-Pyridyl-BODIPYs: Effects of 2,6-substitution with Electron-Withdrawing Nitro, Chloro, and Methoxycarbonyl Groups

Caroline Ndung’U<sup>1</sup>, Petia Bobadova-Parvanova<sup>2</sup>, Daniel LaMaster<sup>1</sup>, Dylan Goliber<sup>2</sup>, Frank R. Fronczek<sup>1</sup> and Maria da Graça H. Vicente,<sup>\*</sup>

### Table of Contents

|                                                   |   |
|---------------------------------------------------|---|
| Spectroscopic Properties.....                     | 2 |
| BODIPYs conformations and relative energies ..... | 2 |
| Absorption Spectra .....                          | 3 |
| Emission Spectra .....                            | 4 |
| NMR spectra .....                                 | 5 |

**Table S1.** Spectroscopic properties of BODIPYs in Toluene and relative fluorescence quantum yields using (a) rhodamine 6G ( $\Phi_f = 0.86$ ) in methanol,  $\lambda_{exc} = 473$  nm

| Solvent | BODIPY                 | $\lambda_{abs}$ (nm) | $\lambda_{em}$ (nm) | Stokes Shift (nm) | $\Phi_f$ | $\epsilon$ ( $M^{-1} cm^{-1}$ ) |
|---------|------------------------|----------------------|---------------------|-------------------|----------|---------------------------------|
| Toluene | 2PyCO <sub>2</sub> Me  | 508                  | 523                 | 15                | 0.04     | 72285                           |
|         | 3PyCO <sub>2</sub> Me  | 508                  | 521                 | 13                | 0.47     | 77490                           |
|         | 4PyCO <sub>2</sub> Me  | 507                  | 520                 | 13                | 0.45     | N/A                             |
|         | 2PyNO <sub>2</sub>     | 501                  | 518                 | 17                | 0.03     | 27390                           |
|         | 3PyNO <sub>2</sub>     | 500                  | 517                 | 17                | 0.5      | 53385                           |
|         | 4PyNO <sub>2</sub>     | 500                  | 517                 | 17                | 0.38     | 57080                           |
|         | 2PyNO <sub>2</sub> /Cl | 520                  | 538                 | 18                | 0.05     | 30780                           |
|         | 3PyNO <sub>2</sub> /Cl | 521                  | 536                 | 15                | 0.47     | 22940                           |
|         | 4PyNO <sub>2</sub> /Cl | 520                  | 537                 | 17                | 0.42     | 20130                           |

**Figure S1.** Conformations and relative energies for a) 2PyCO<sub>2</sub>Me, b) 2PyNO<sub>2</sub>, and c) 2PyNO<sub>2</sub>Cl. Analogous conformations were also studied for the 3Py and 4Py series.

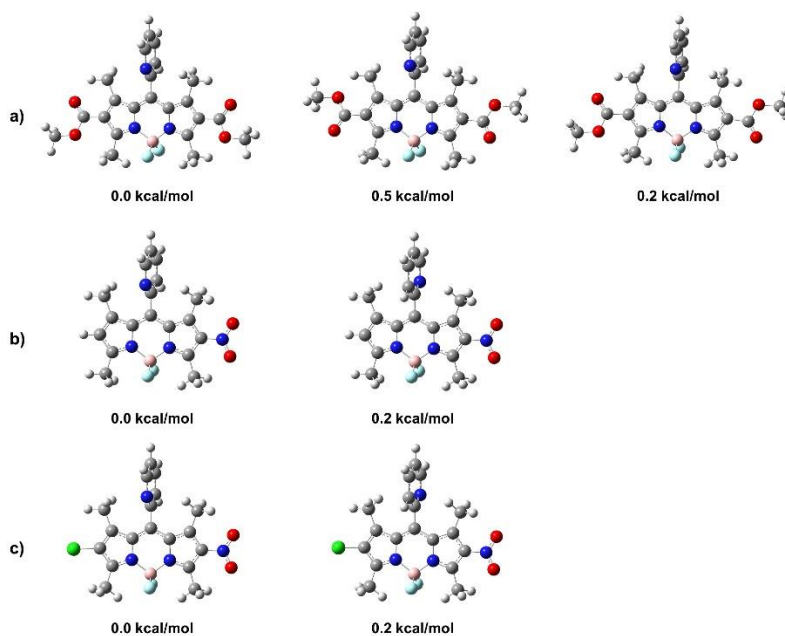

**Figure S2.** Normalized absorption spectra (1a, b) in CH<sub>3</sub>CN (1c,1d) in MeOH and (1e,1f) in toluene.

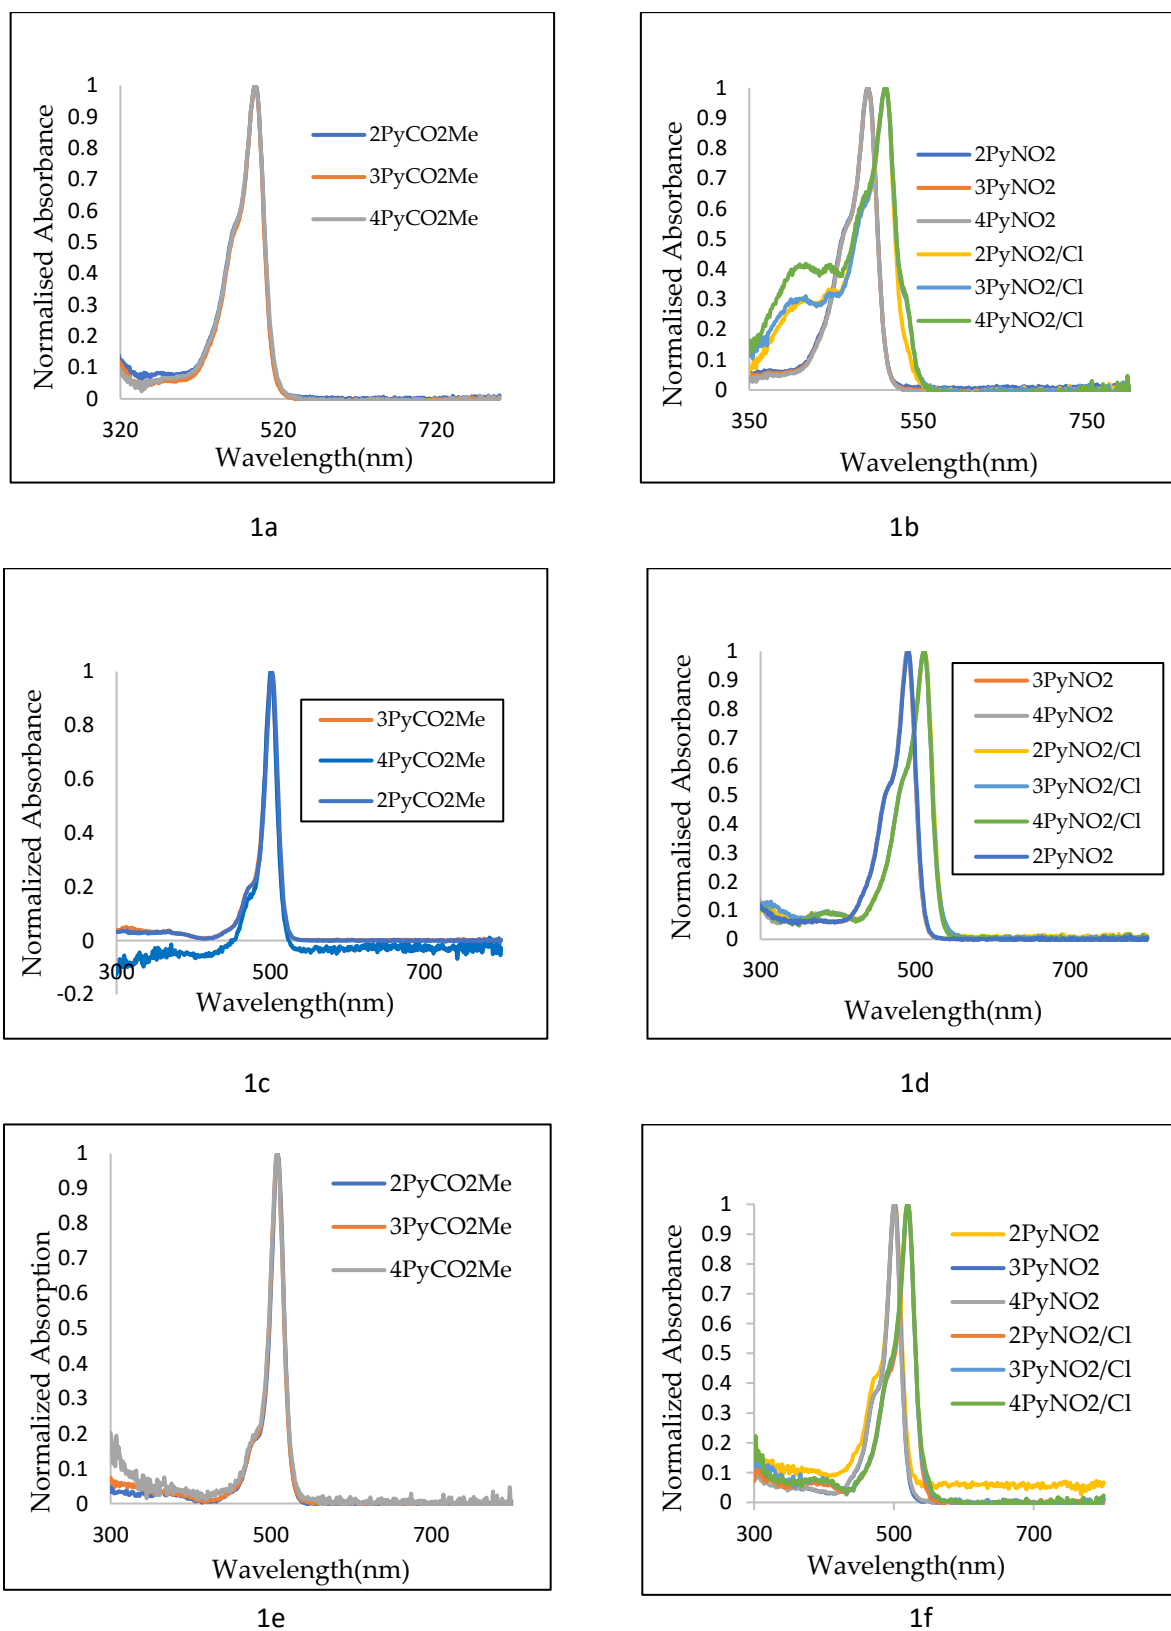

**Figure S3.** Normalized emission spectra (2a, 2b) in CH<sub>3</sub>CN (2c, 2d) in MeOH and (2e,2f) in toluene.

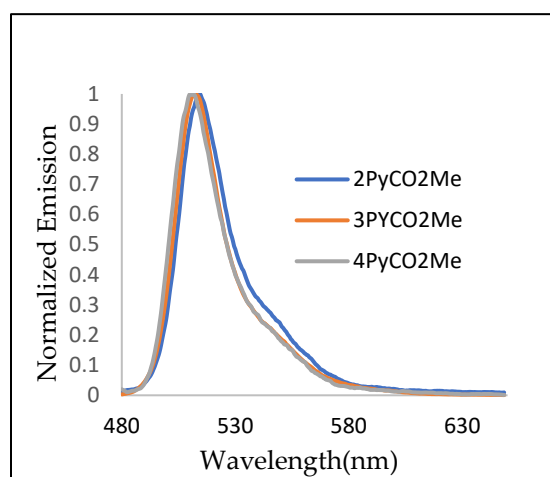

2a

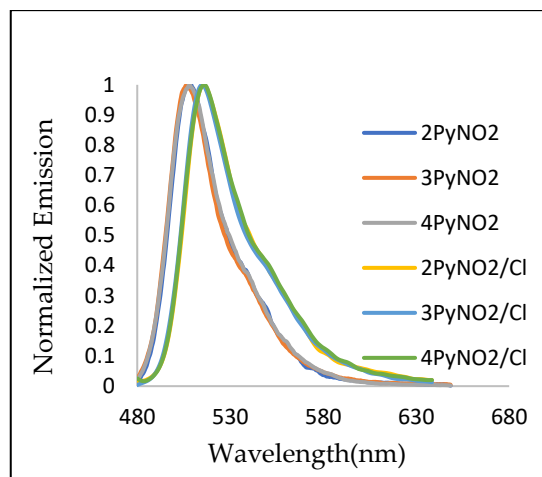

2b

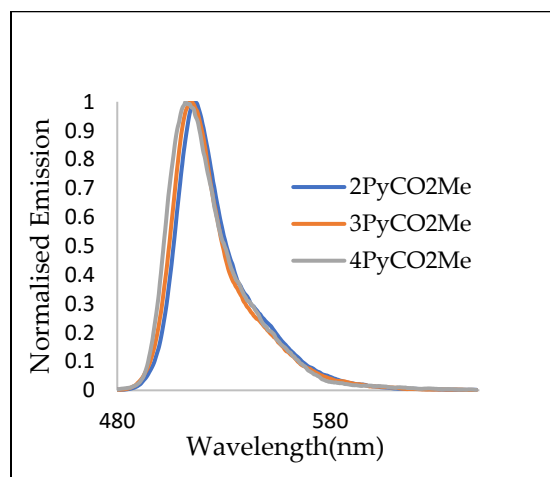

2c

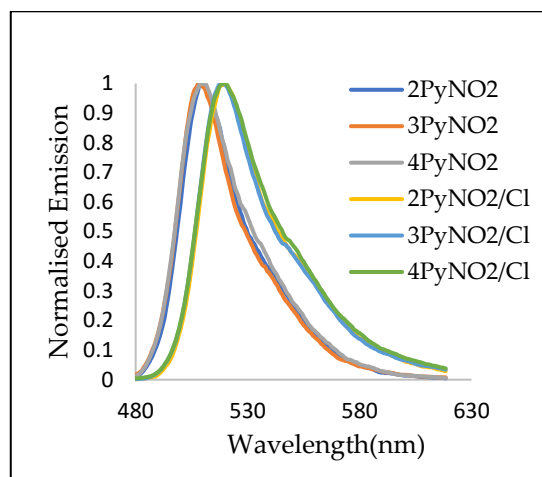

2d

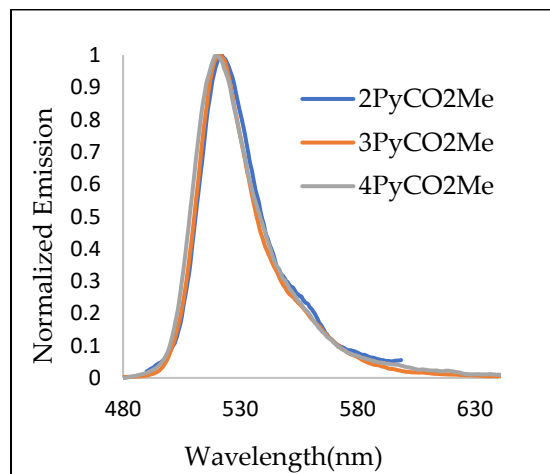

2e

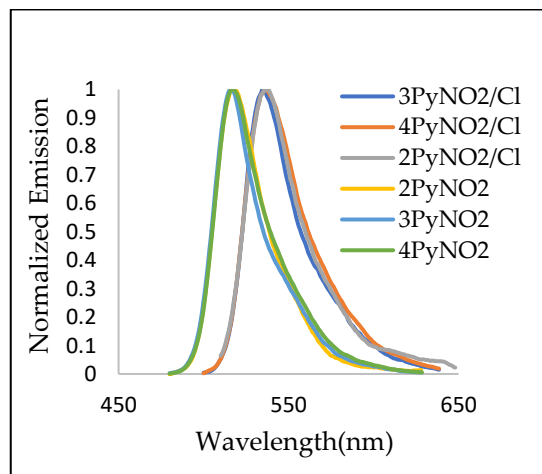

2f

## NMR Spectra

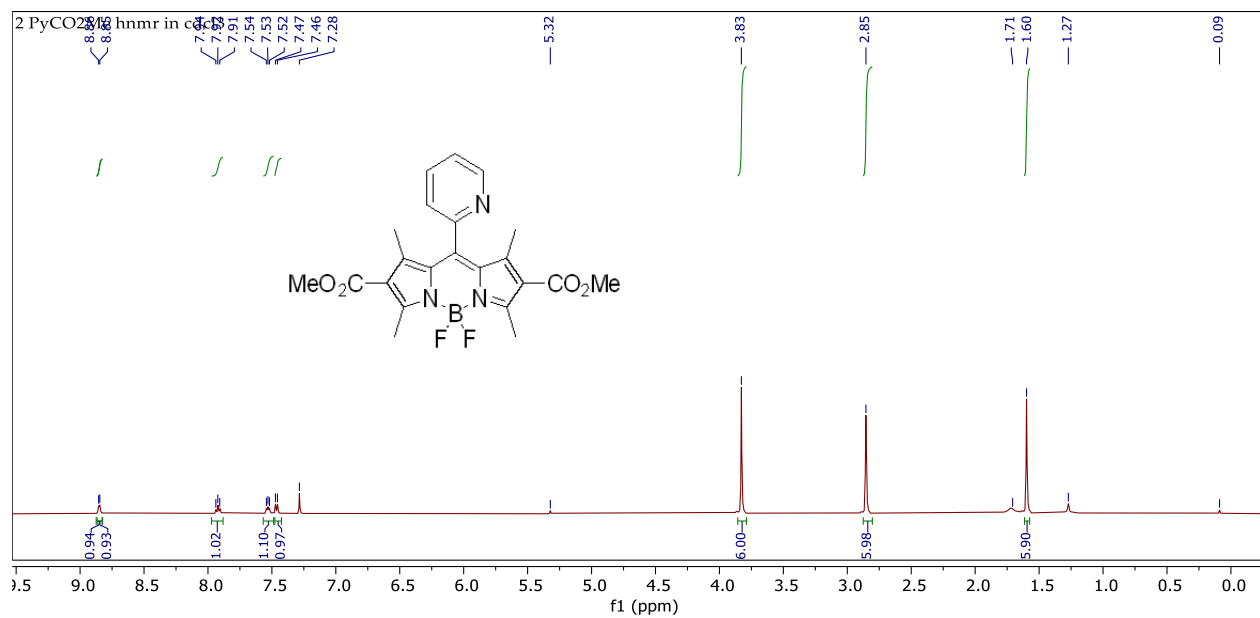

Figure S4. <sup>1</sup>H of BODIPY 2PyCO<sub>2</sub>Me in CDCl<sub>3</sub>

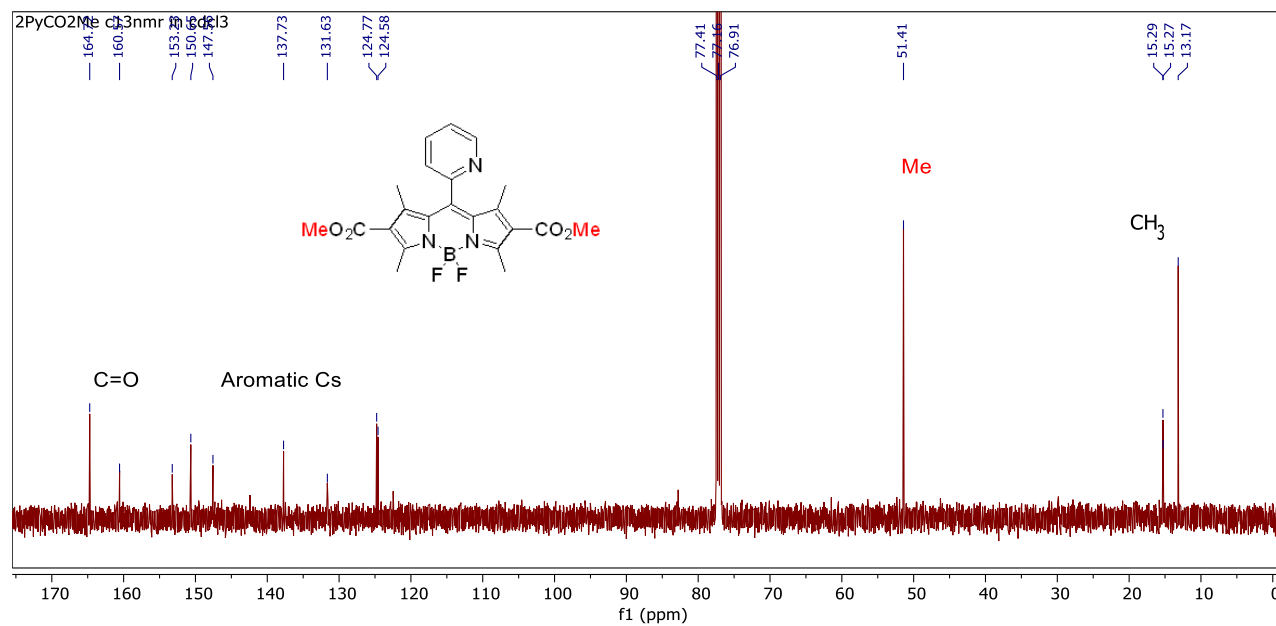

Figure S5. <sup>13</sup>C of BODIPY 2PyCO<sub>2</sub>Me in CDCl<sub>3</sub>

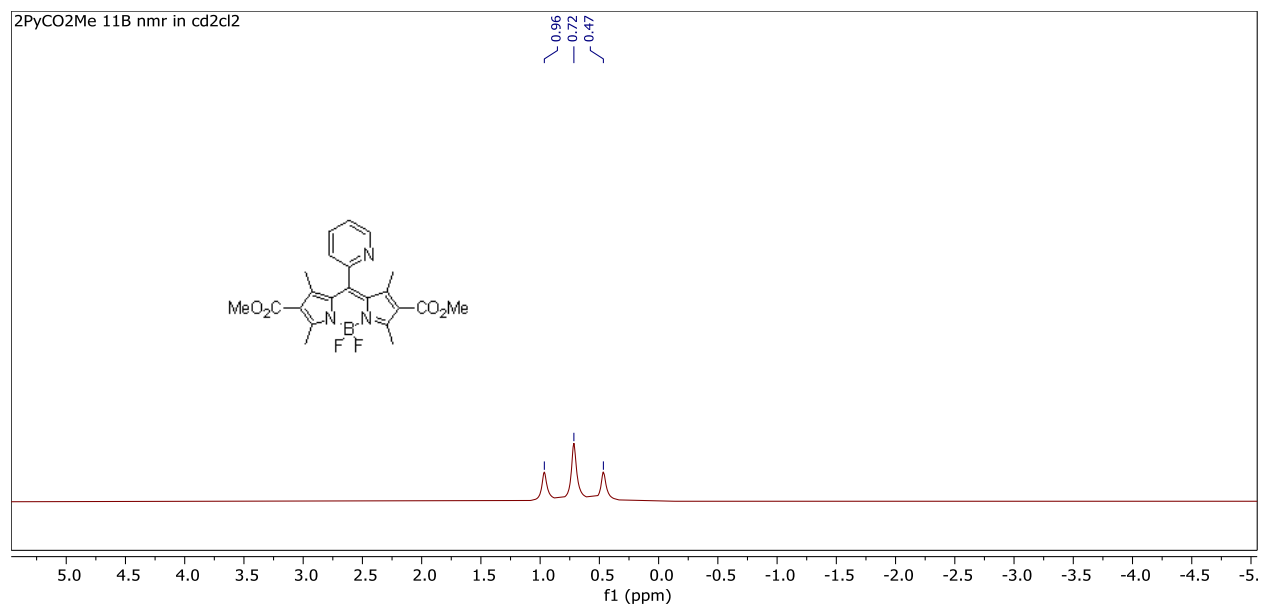

**Figure S6.** <sup>11</sup>B of BODIPY 2PyCO<sub>2</sub>Me in CD<sub>2</sub>Cl<sub>2</sub>

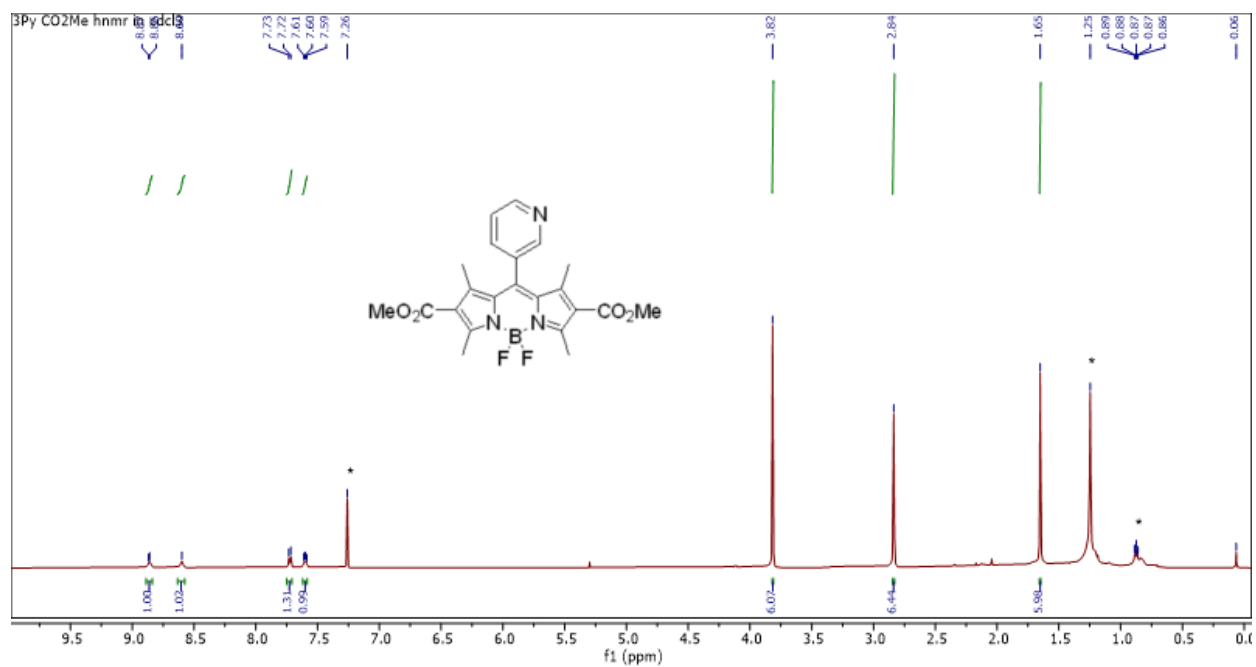

**Figure S7.** <sup>1</sup>H of BODIPY 3PyCO<sub>2</sub>Me in CDCl<sub>3</sub>

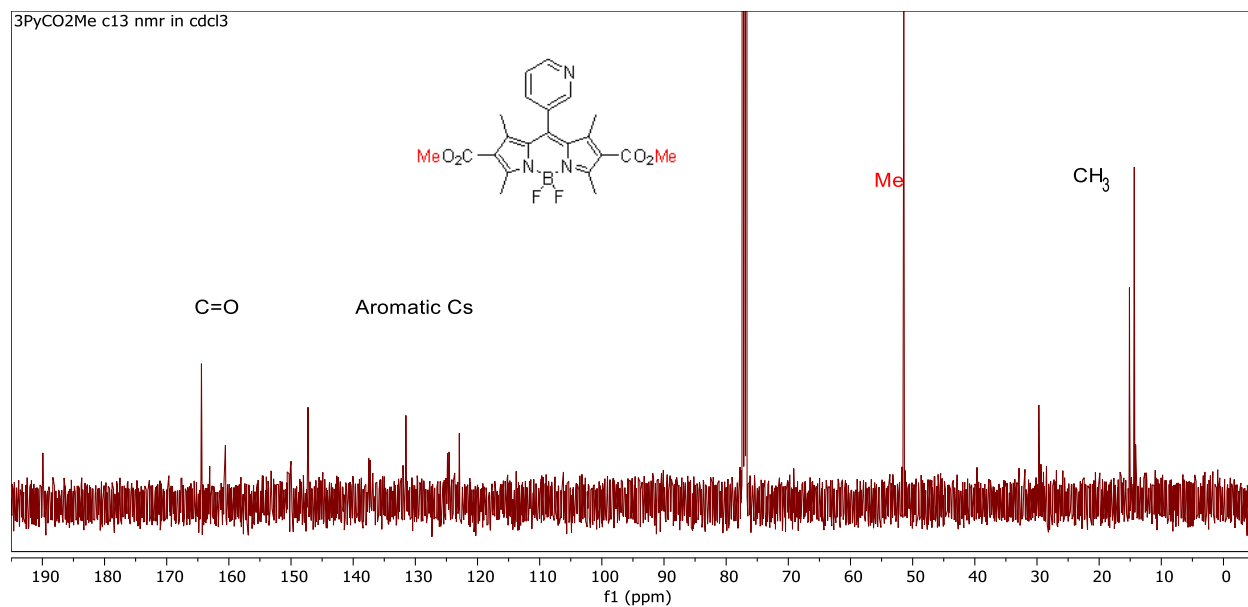

**Figure S8.** <sup>13</sup>C of BODIPY 3PyCO<sub>2</sub>Me in CDCl<sub>3</sub>

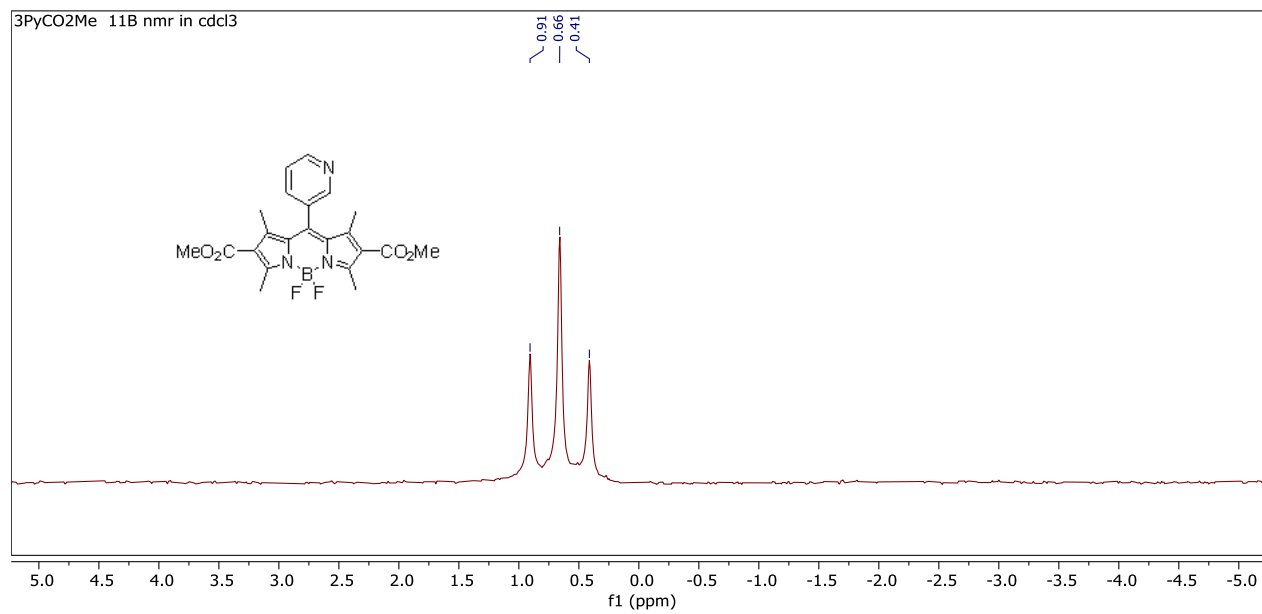

**Figure S9.** <sup>11</sup>B of BODIPY 3PyCO<sub>2</sub>Me in CDCl<sub>3</sub>

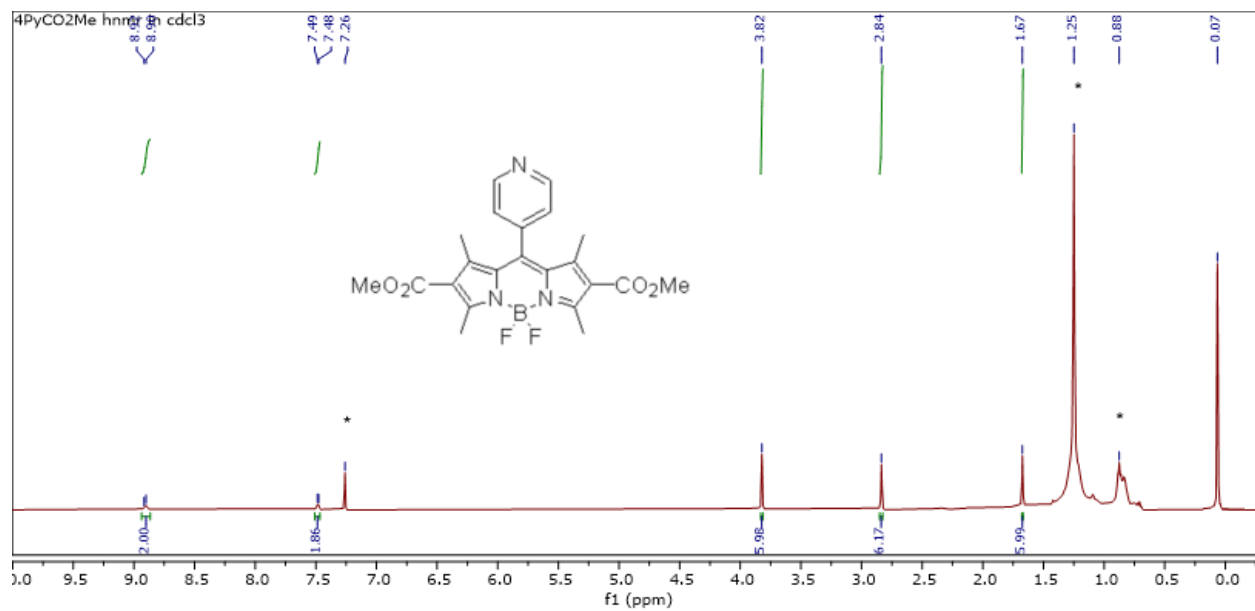

Figure S10. <sup>1</sup>H of BODIPY 4PyCO<sub>2</sub>Me in CDCl<sub>3</sub>

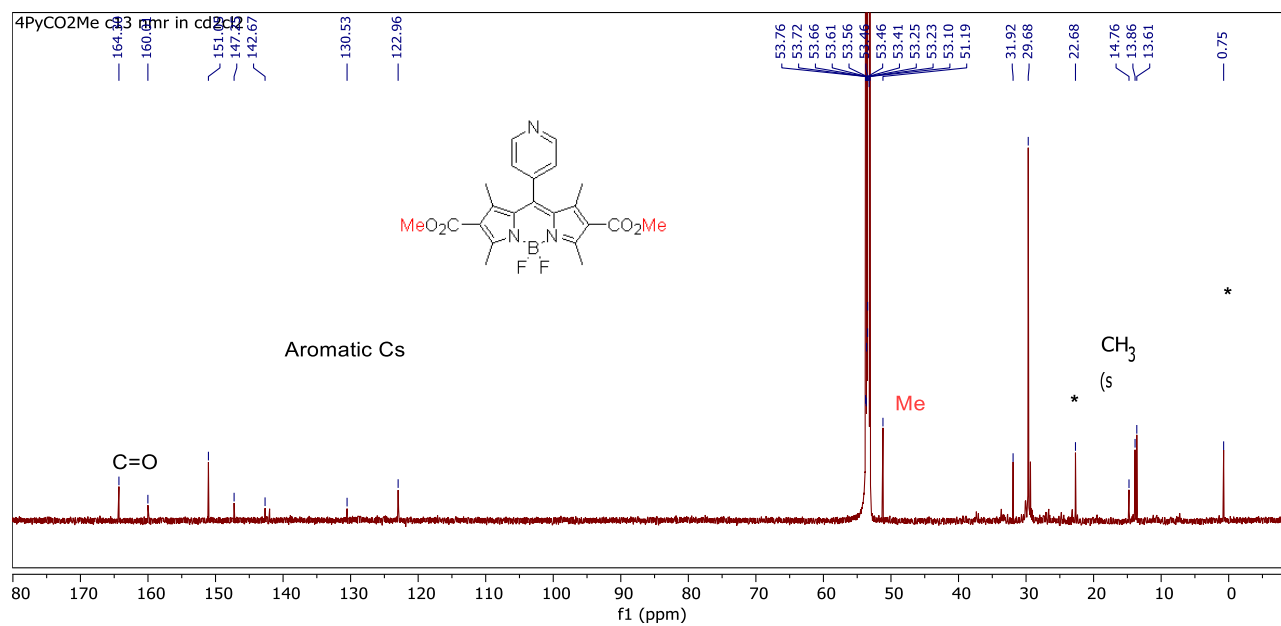

Figure S11. <sup>13</sup>C of BODIPY 4PyCO<sub>2</sub>Me in CD<sub>2</sub>Cl<sub>2</sub>



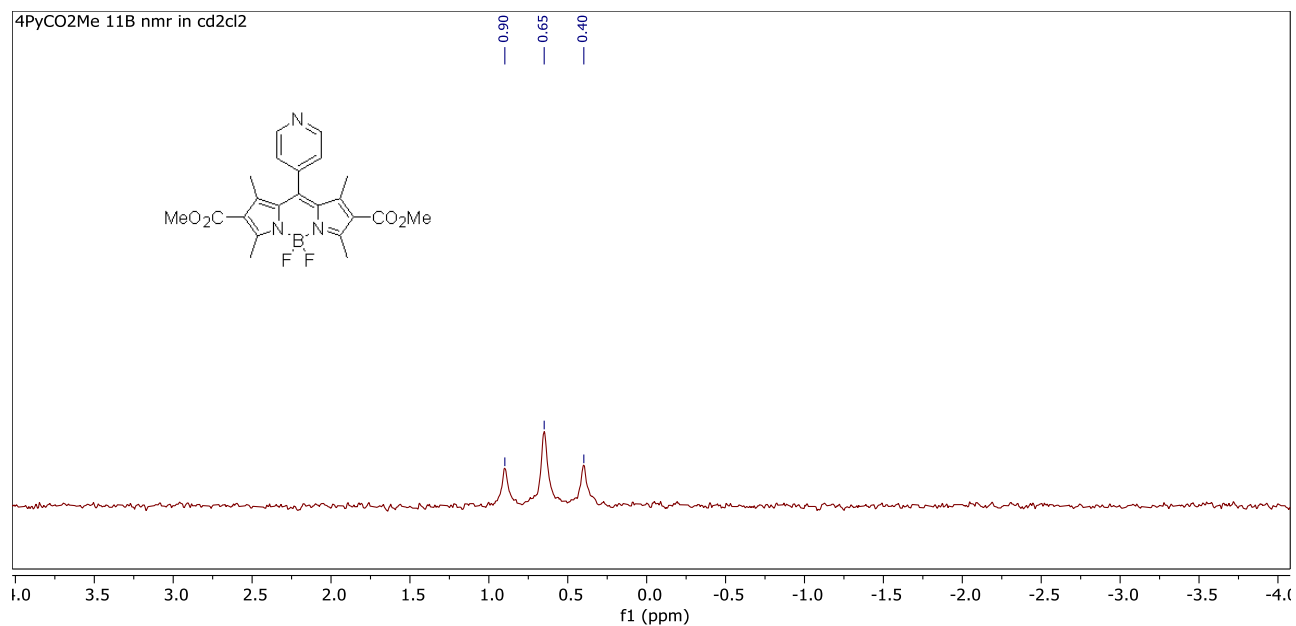

Figure S12. <sup>11</sup>B of BODIPY 4PyCO<sub>2</sub>Me in CD<sub>2</sub>Cl<sub>2</sub>

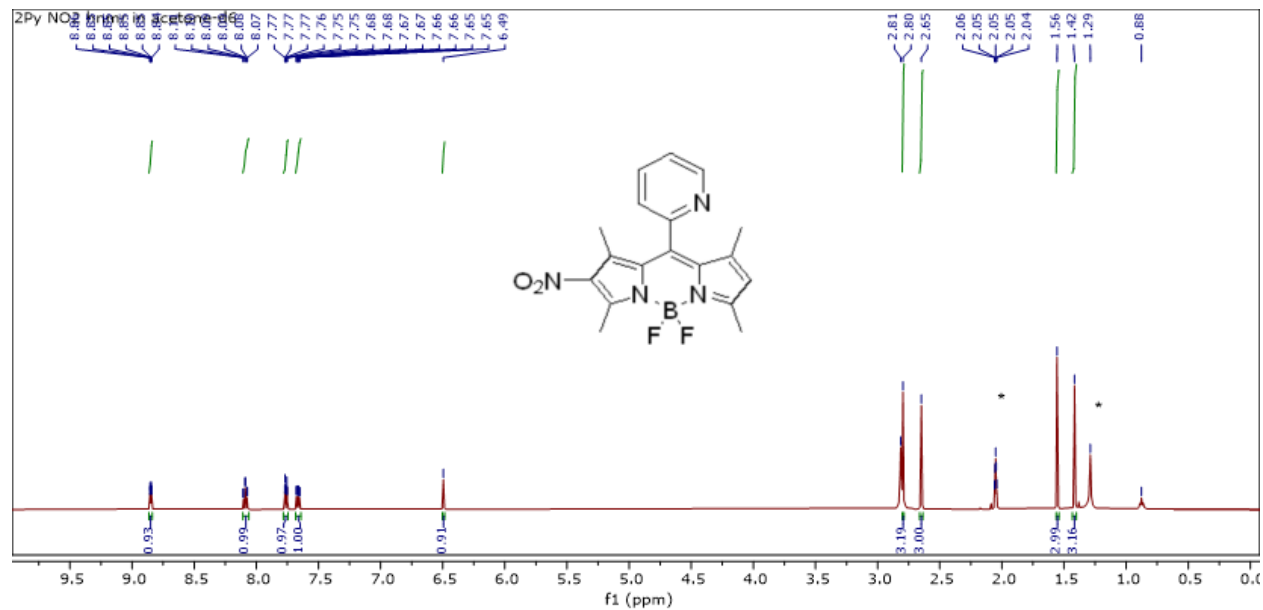

Figure S13. <sup>1</sup>H of BODIPY 2PyNO<sub>2</sub> in acetone-d<sub>6</sub>

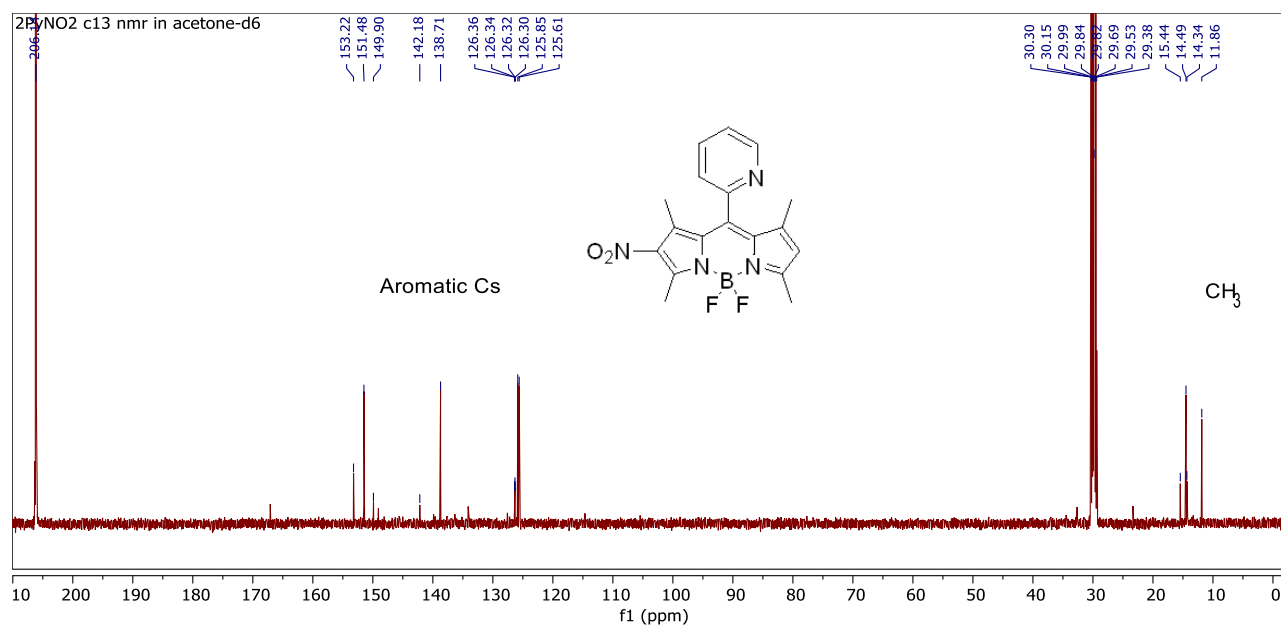

Figure S14. <sup>13</sup>C of BODIPY 2PyNO<sub>2</sub> in acetone-d<sub>6</sub>

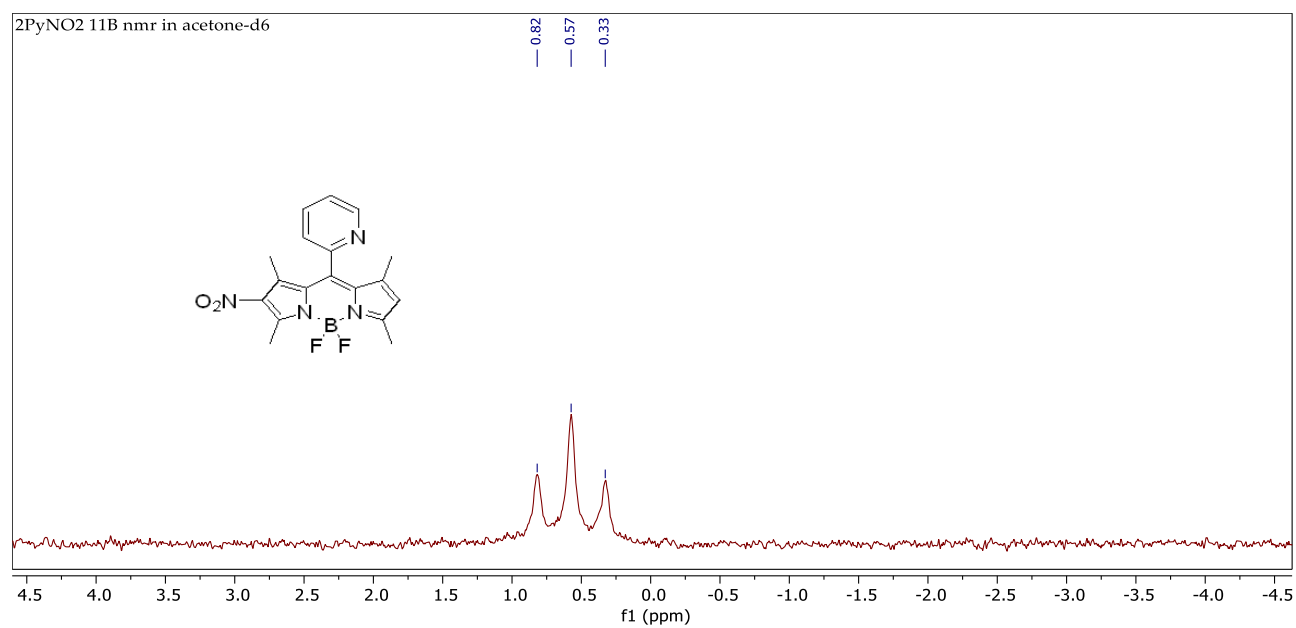

Figure S15. <sup>11</sup>B of BODIPY 2PyNO<sub>2</sub> in acetone-d<sub>6</sub>

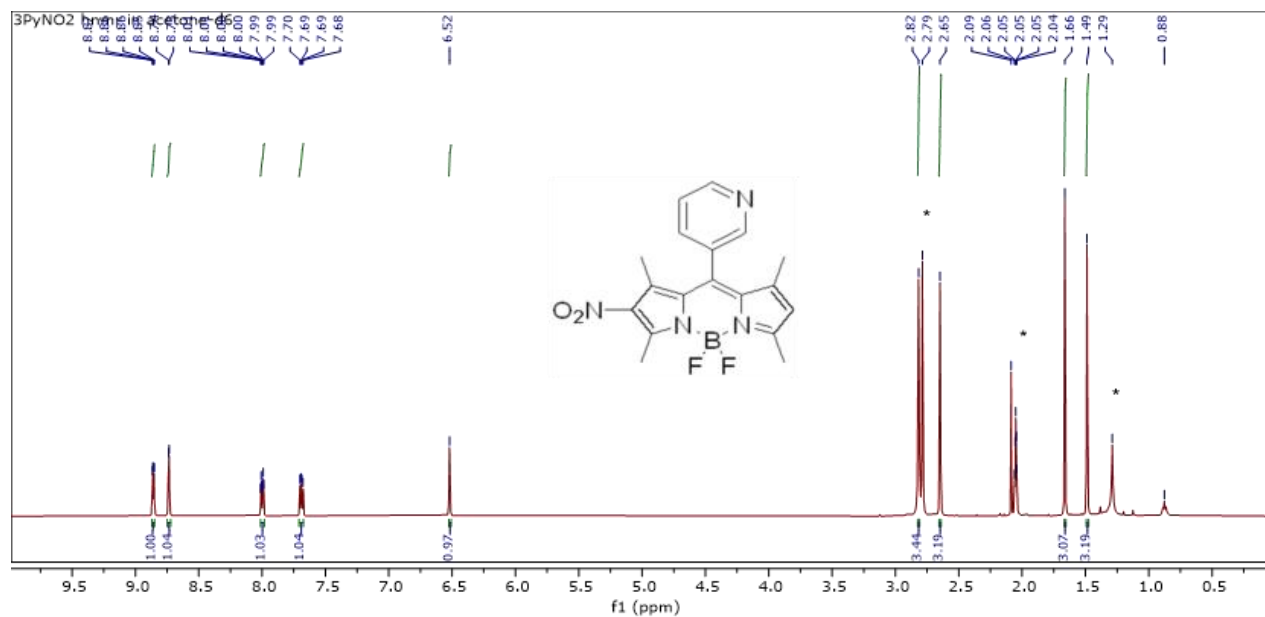

**Figure S16.** <sup>1</sup>H of BODIPY 3PyNO<sub>2</sub> in acetone-d<sub>6</sub>

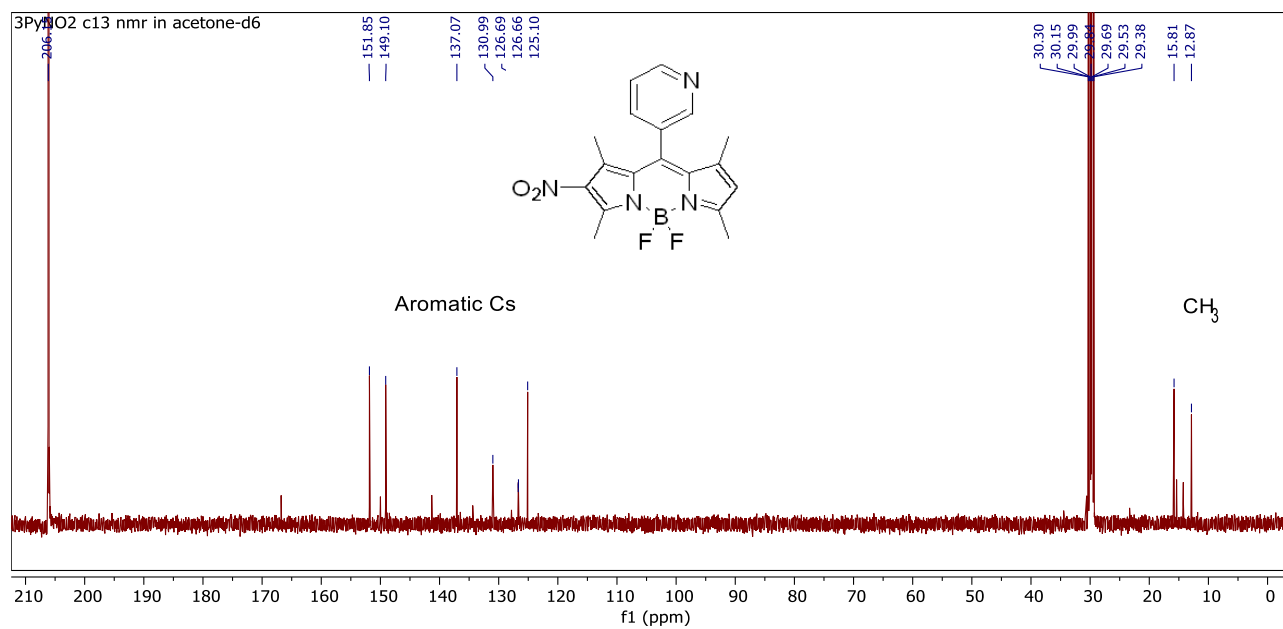

**Figure S17.** <sup>13</sup>C of BODIPY 3PyNO<sub>2</sub> in acetone-d<sub>6</sub>

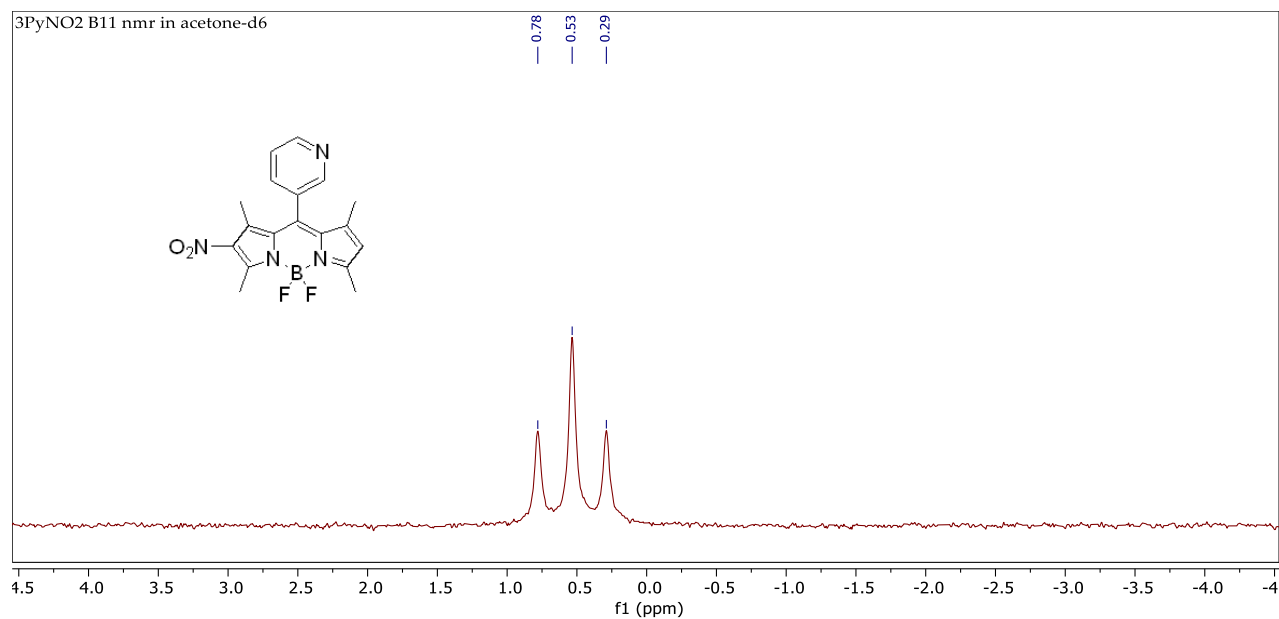

Figure S18. <sup>11</sup>B of BODIPY 3PyNO<sub>2</sub> in acetone-d<sub>6</sub>

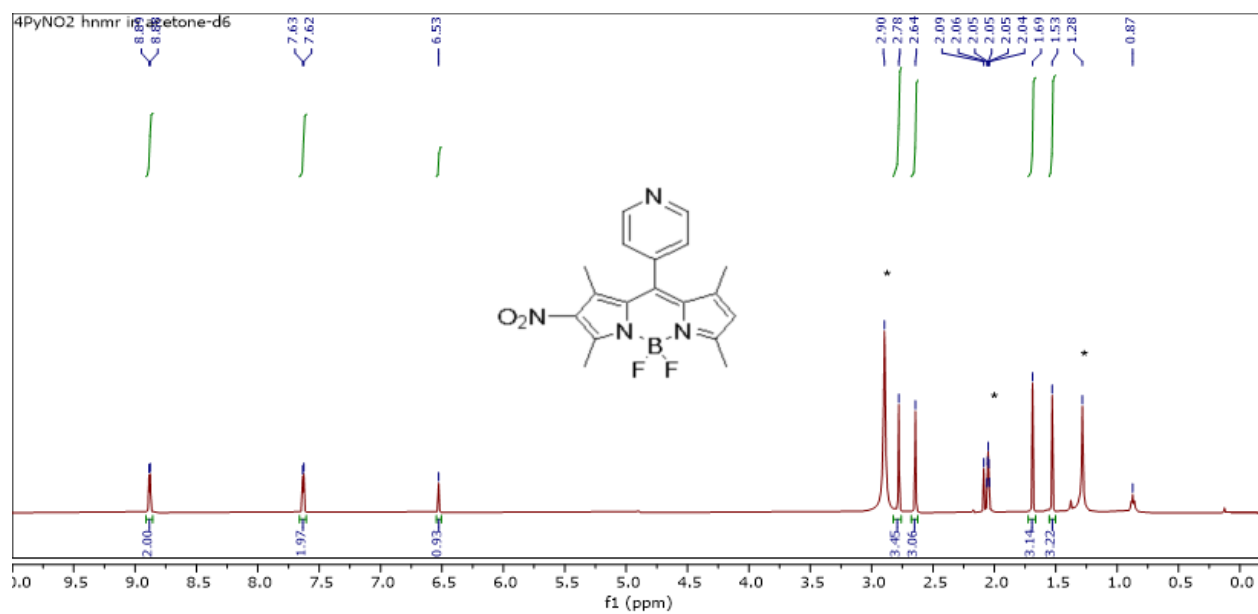

Figure S19. <sup>1</sup>H of BODIPY 4PyNO<sub>2</sub> in Acetone-d<sub>6</sub>

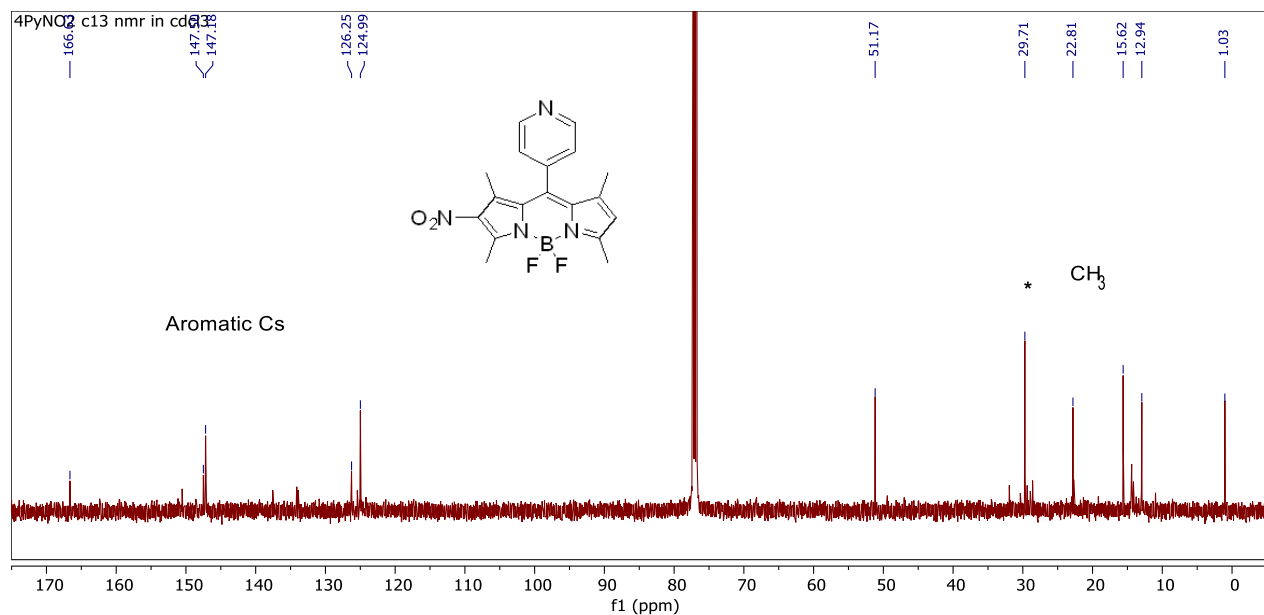

Figure S20. <sup>13</sup>C of BODIPY 4PyNO<sub>2</sub> in CDCl<sub>3</sub>

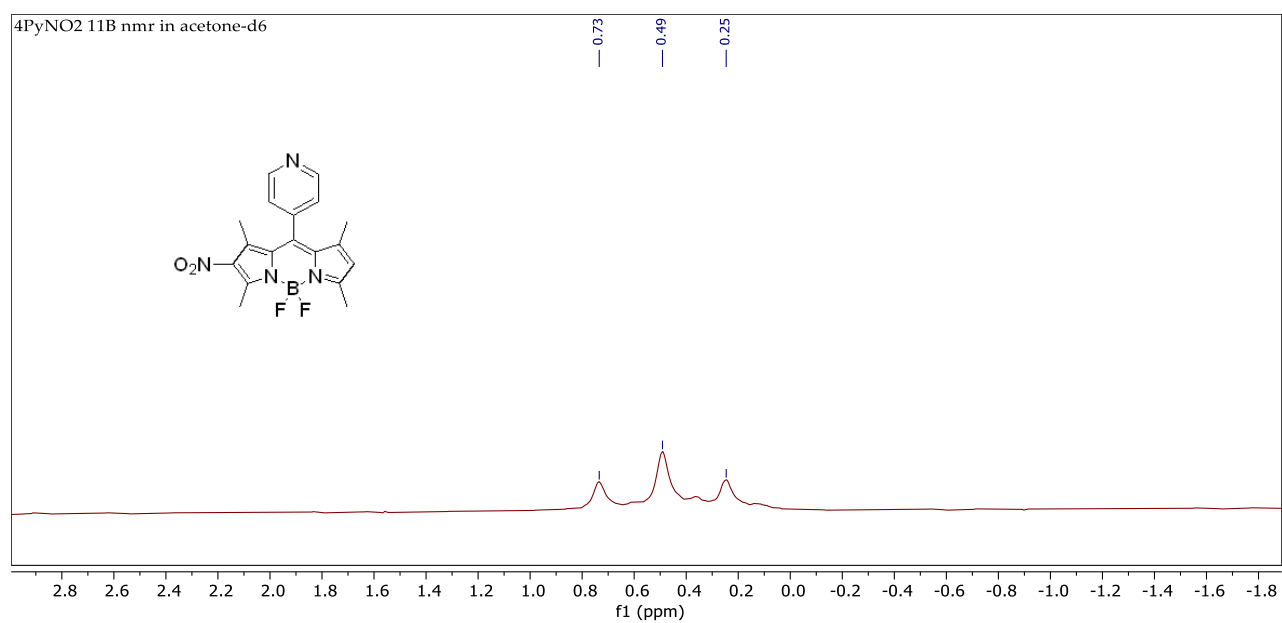

Figure S21. <sup>11</sup>B of BODIPY 4PyNO<sub>2</sub> in acetone-d<sub>6</sub>

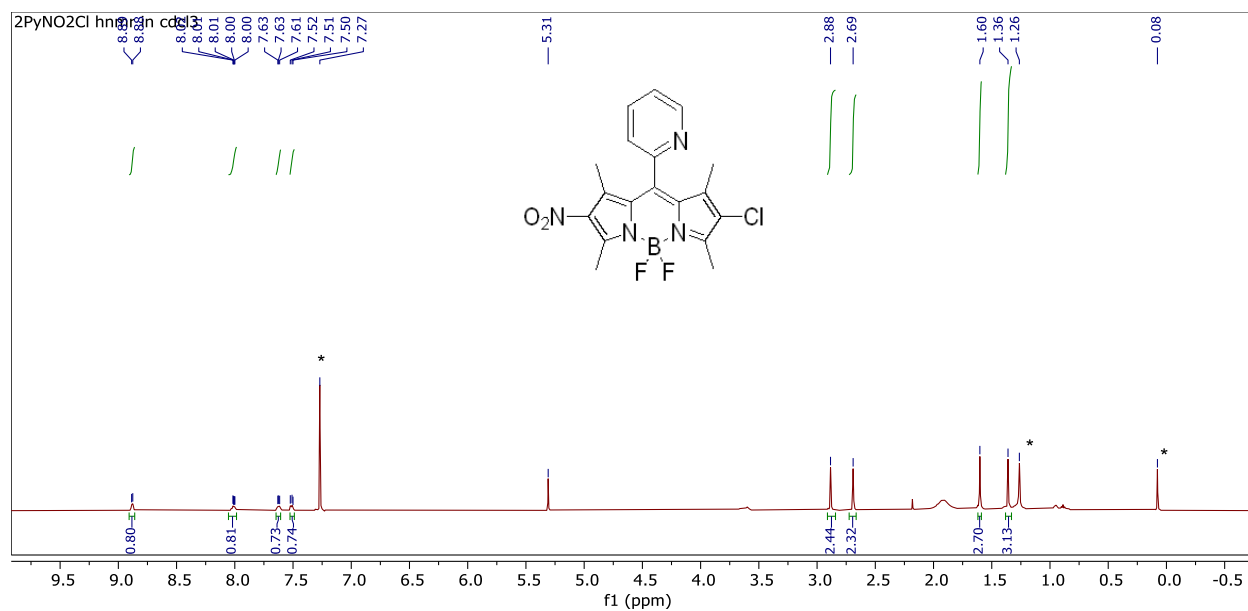

Figure S22. <sup>1</sup>H of BODIPY 2PyNO<sub>2</sub>Cl in CDCl<sub>3</sub>

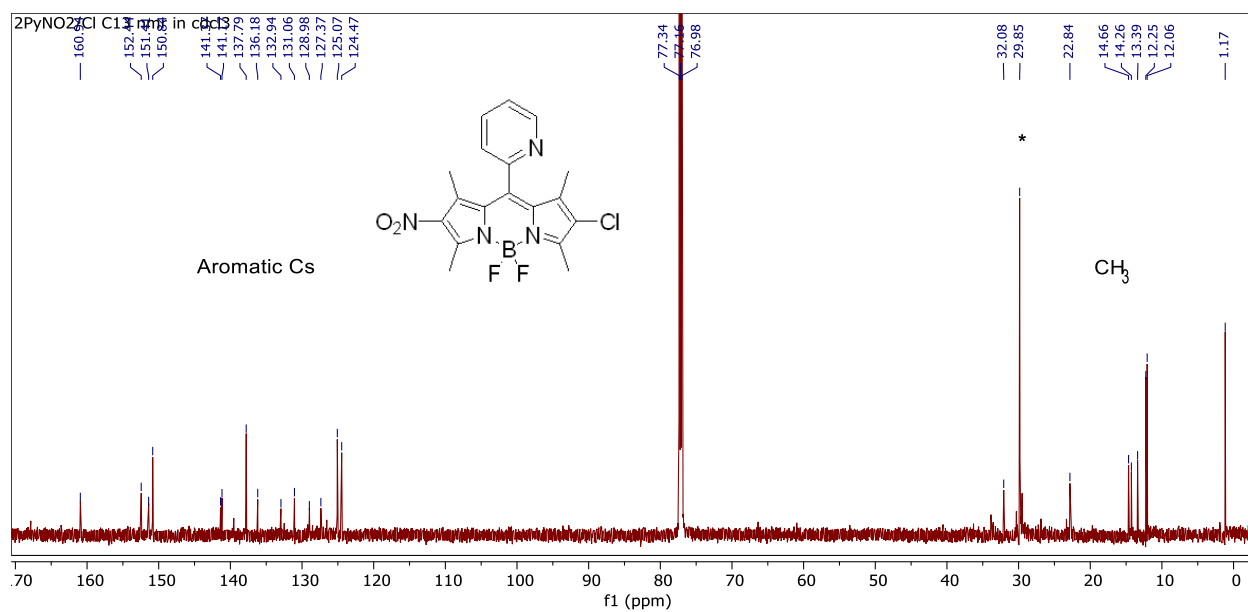

Figure S23. <sup>13</sup>C of BODIPY 2PyNO<sub>2</sub>Cl in CDCl<sub>3</sub>

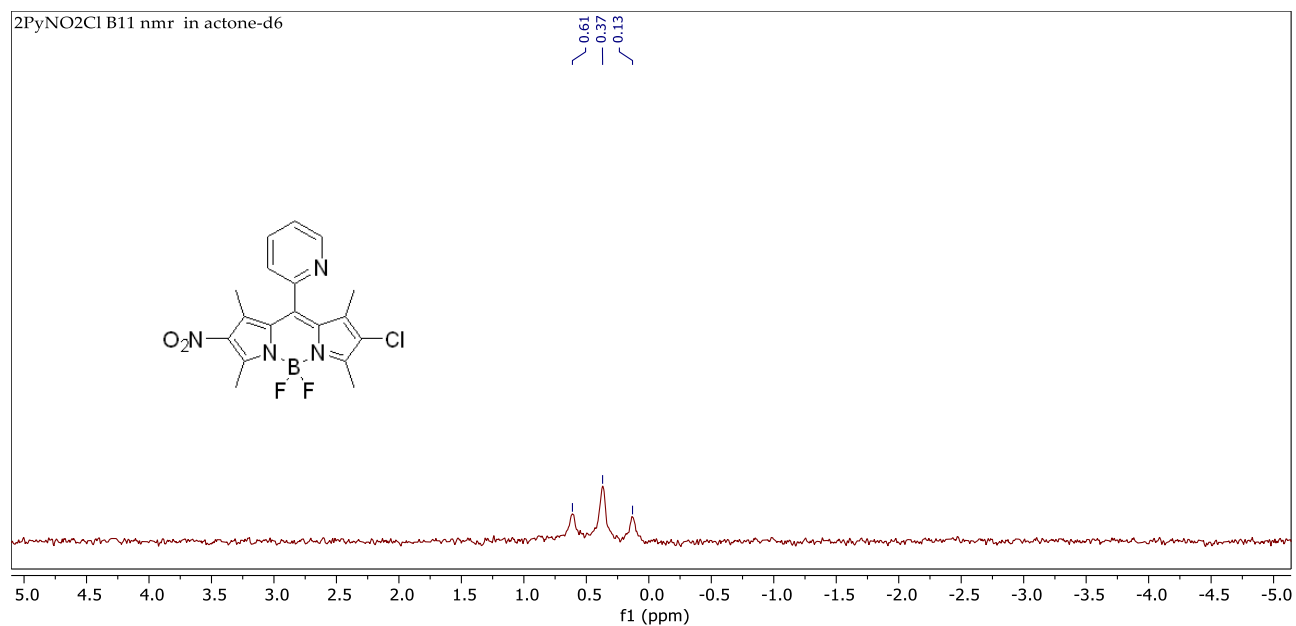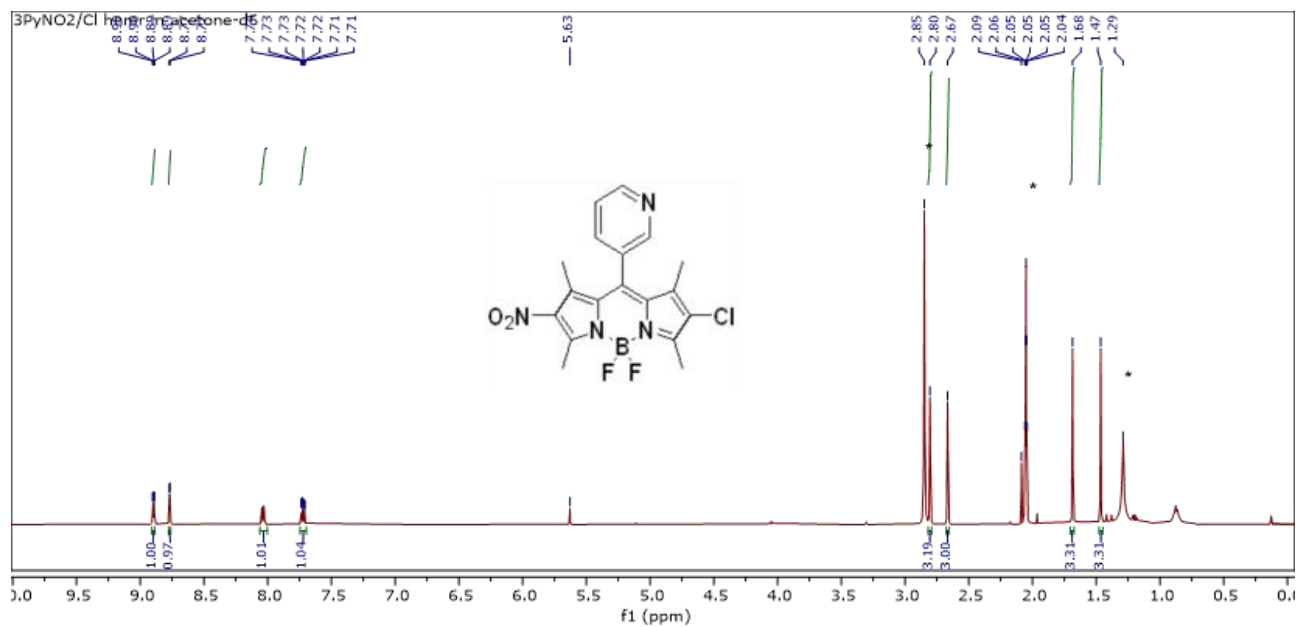

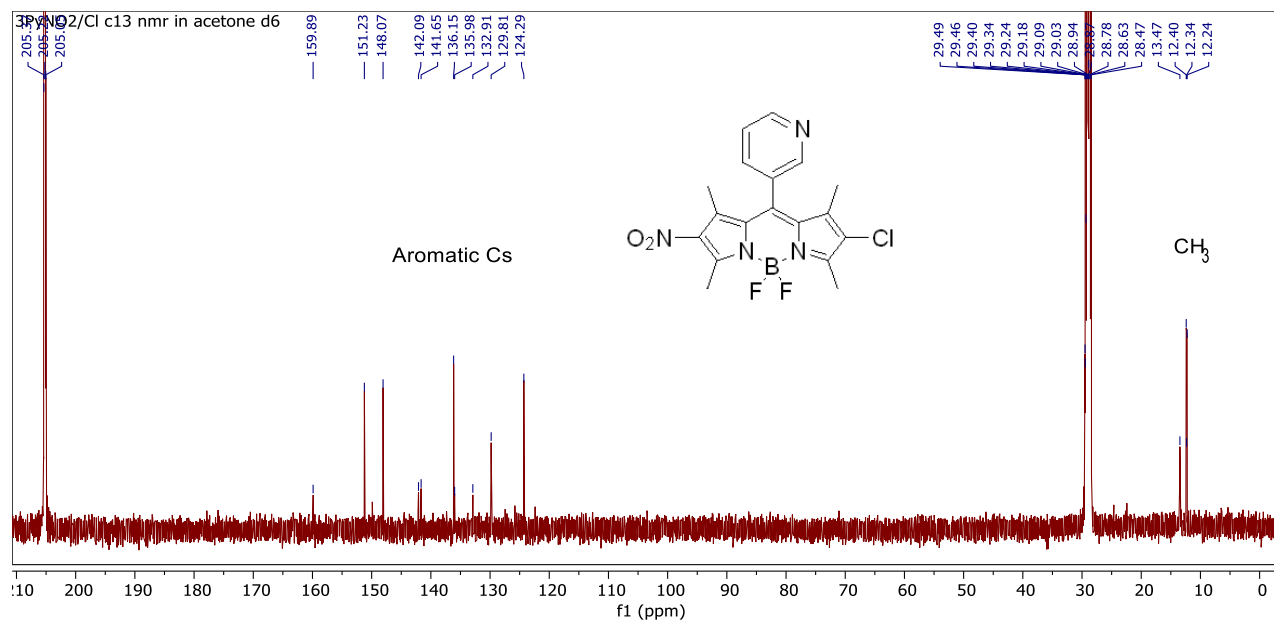

Figure S26. <sup>13</sup>C of BODIPY 3PyNO<sub>2</sub>Cl in Acetone-d<sub>6</sub>

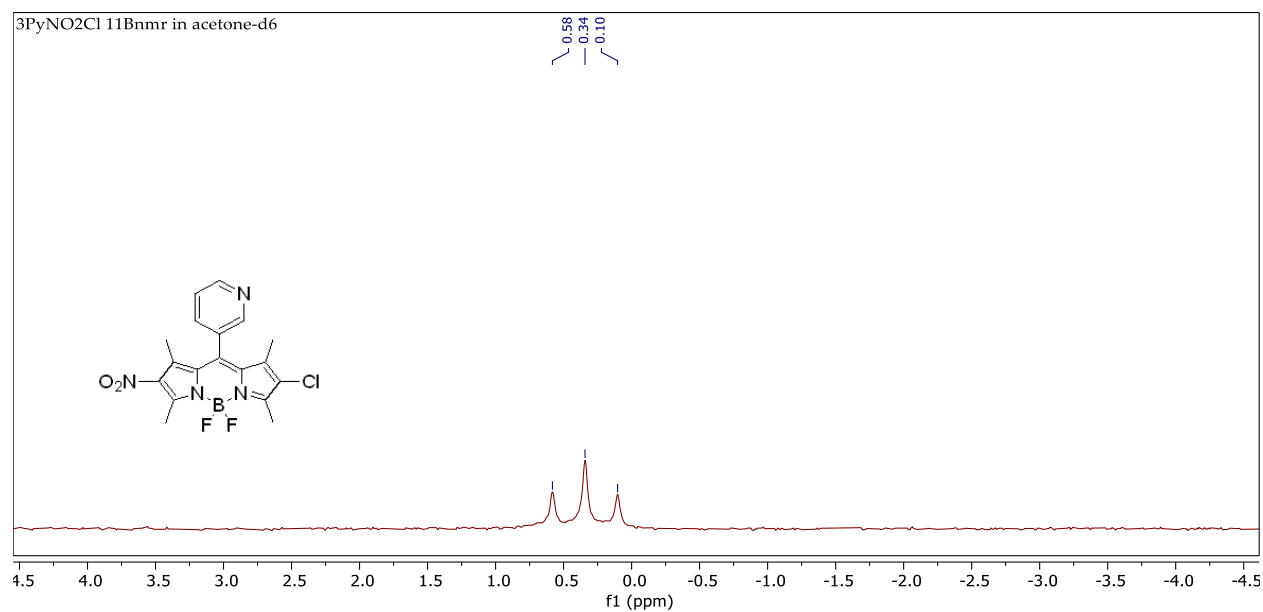

Figure S27. <sup>11</sup>B of BODIPY 3PyNO<sub>2</sub>Cl in acetone-d<sub>6</sub>



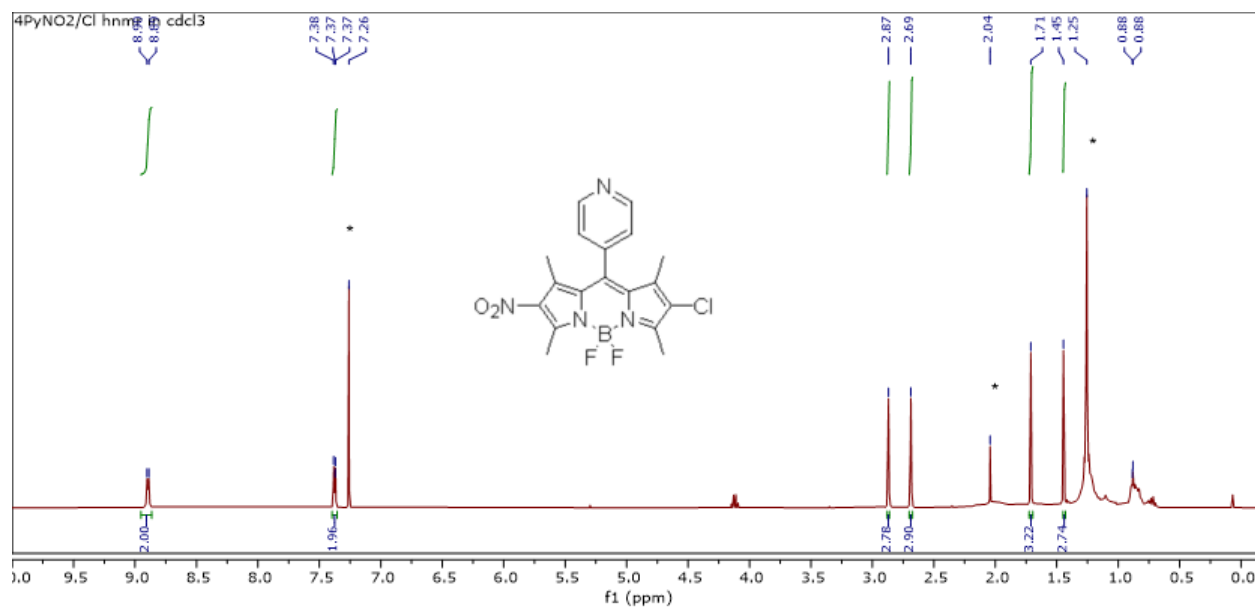

Figure S28. <sup>1</sup>H of BODIPY 4PyNO<sub>2</sub>Cl in CDCl<sub>3</sub>

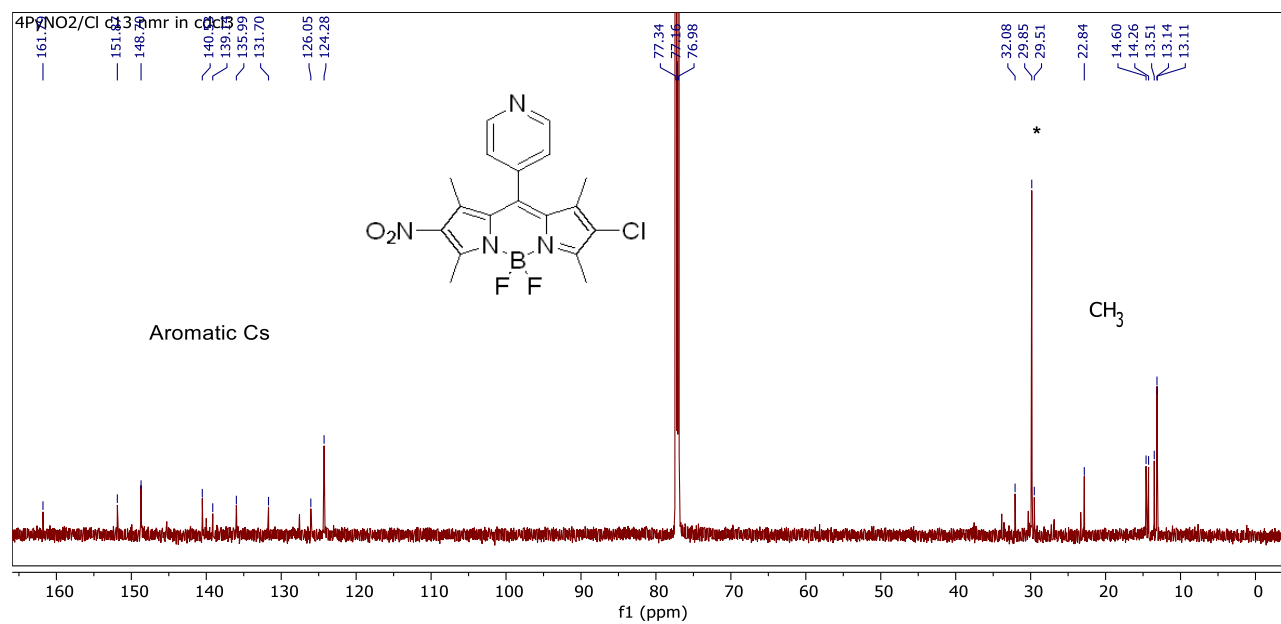

Figure S29. <sup>13</sup>C of BODIPY 4PyNO<sub>2</sub>Cl in CDCl<sub>3</sub>

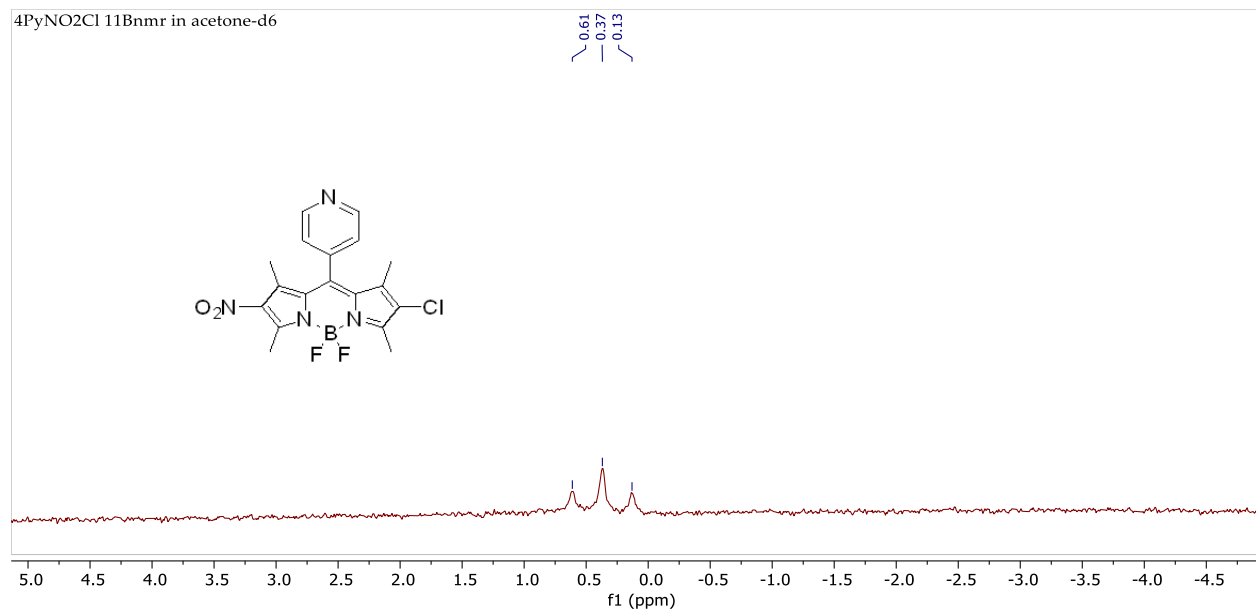

**Figure S30.** <sup>11</sup>B of BODIPY 4PyNO<sub>2</sub>Cl in acetone-d<sub>6</sub>
